# Supplementary material for: Network motif analysis of a multi-mode genetic-interaction network
Source: Springer Nature journal article supplement (doi:10.1186/gb-2007-8-8-r160), 2007-01-01
Supplement: Additional file 1 [file gb-2007-8-8-r160-s1.pdf]

|                 |                 |                 |                |                 |                |
|-----------------|-----------------|-----------------|----------------|-----------------|----------------|
|                 |                 |                 |                |                 |                |
| Motif # 1       | Motif # 2       | Motif # 3       | Motif # 4      | Motif # 5       | Motif # 6      |
| Num Real = 8119 | Num Real = 4509 | Num Real = 1354 | Num Real = 589 | Num Real = 9156 | Num Real = 322 |
|                 |                 |                 |                |                 |                |
| Motif # 7       | Motif # 8       | Motif # 9       | Motif # 10     | Motif # 11      | Motif # 12     |
| Num Real = 1174 | Num Real = 1428 | Num Real = 1864 | Num Real = 329 | Num Real = 720  | Num Real = 361 |
|                 |                 |                 |                |                 |                |
| Motif # 13      | Motif # 14      | Motif # 15      | Motif # 16     | Motif # 17      | Motif # 18     |
| Num Real = 959  | Num Real = 219  | Num Real = 275  | Num Real = 288 | Num Real = 150  | Num Real = 156 |
|                 |                 |                 |                |                 |                |
| Motif # 19      | Motif # 20      | Motif # 22      | Motif # 23     | Motif # 24      | Motif # 25     |
| Num Real = 286  | Num Real = 303  | Num Real = 38   | Num Real = 80  | Num Real = 14   | Num Real = 12  |
|                 |                 |                 |                |                 |                |
| Motif # 26      | Motif # 27      | Motif # 28      |                |                 |                |
| Num Real = 8    | Num Real = 266  | Num Real = 27   |                |                 |                |
