# Supplementary material for: Network motif analysis of a multi-mode genetic-interaction network
Source: Springer Nature journal article supplement (doi:10.1186/gb-2007-8-8-r160), 2007-01-01
Supplement: Additional file 25 [file gb-2007-8-8-r160-s25.pdf]

E

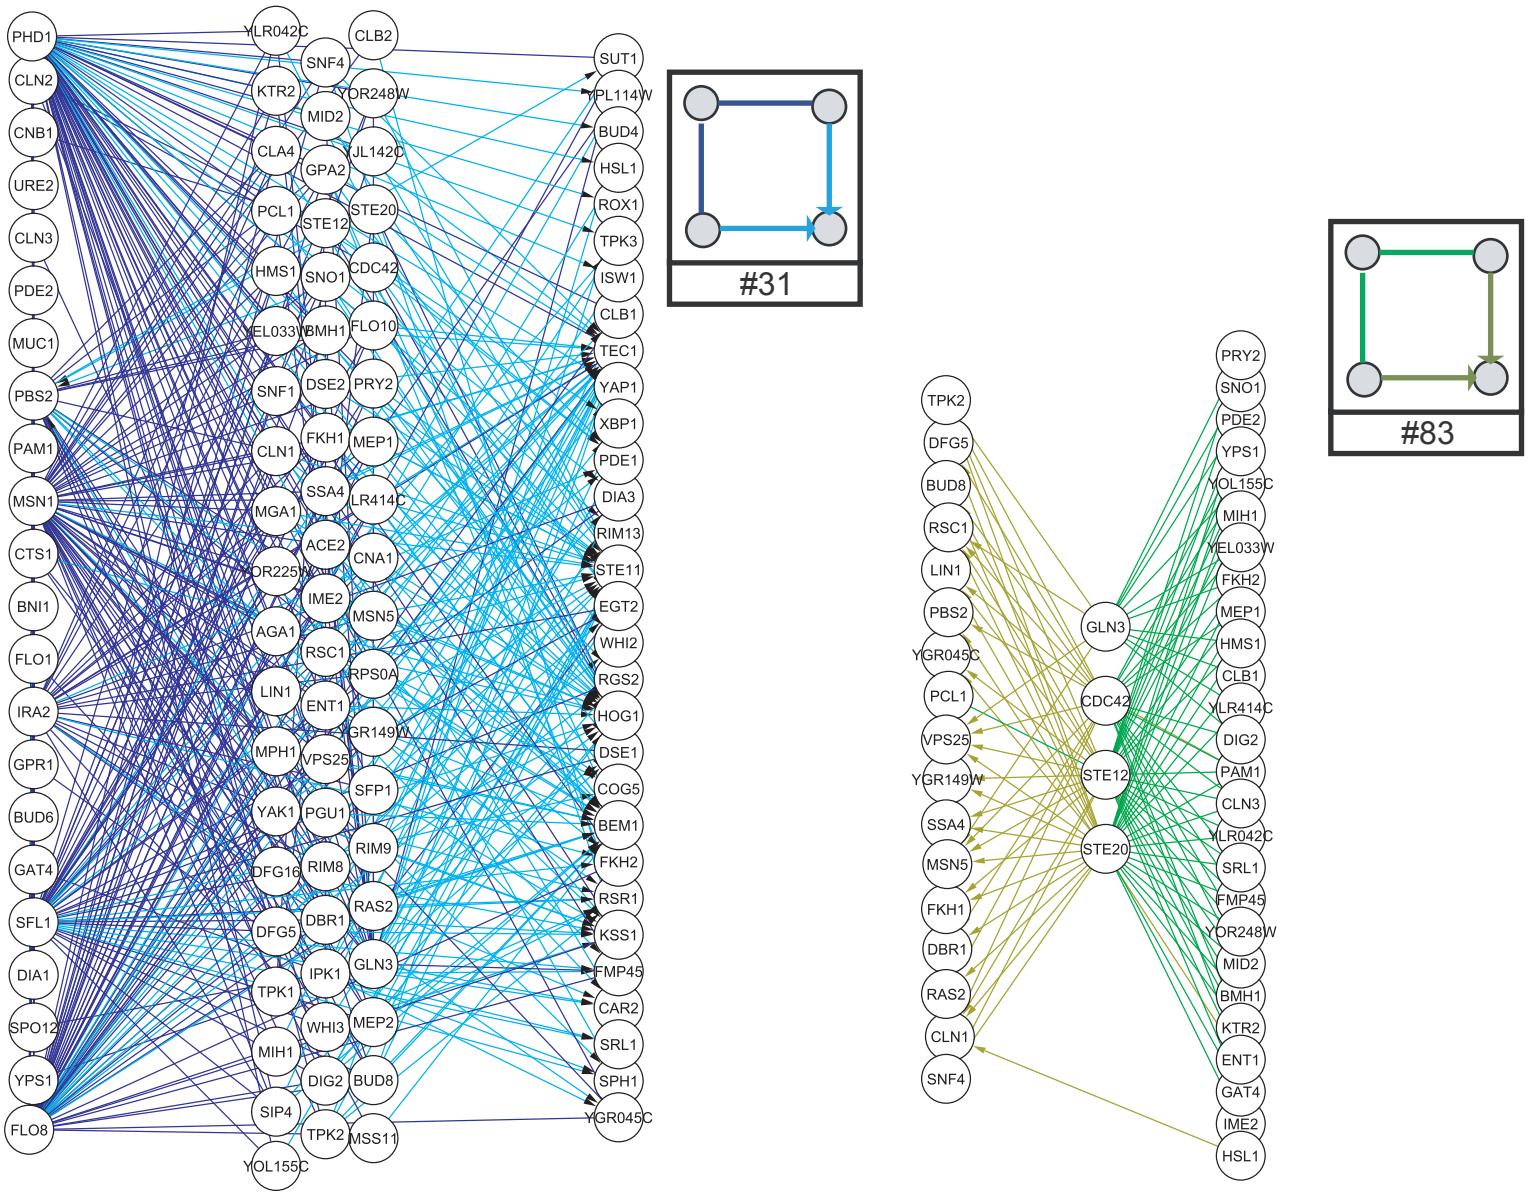

Supplemental Figure 2. Further examples of motif subnetworks, continued.

E) Motif subnetworks of 4n-motifs 31 and 83 illustrate common interaction modes with numerous common interaction partners.
